# Supplementary material for: In Response to “Towards Reference Values for NT-proBNP Applicable in Pediatric Clinical Practice”
Source: Springer Nature journal article supplement (doi:10.1007/s00246-022-02937-6), 2022-06-11
Supplement: MOESM1 [file 23152056]

Table 2: Estimated 5<sup>th</sup>, 50<sup>th</sup>, 75<sup>th</sup>, 95<sup>th</sup> and 97.5<sup>th</sup> sex-adjusted percentiles for NT-proBNP (values in ng/L) from the LIFE child study cohort (children aged 0.25-18 years) in comparison to the non sex-specific 75<sup>th</sup> and 97.5<sup>th</sup> percentiles from Albers et al. [4]

| LIFE data NT-proBNP (ng/L) select percentiles |        |      |        |      |        |       |        |       |        |       |              |              | 75th and 97.5th percentiles acc. Albers et al. [4] |    |       |              |
|-----------------------------------------------|--------|------|--------|------|--------|-------|--------|-------|--------|-------|--------------|--------------|----------------------------------------------------|----|-------|--------------|
| age, years                                    | n      |      | 5th    |      | 50th   |       | 75th   |       | 95th   |       | 97.5th       |              | age, years                                         | n  | 75th  | 97.5th       |
|                                               | female | male | female | male | female | male  | female | male  | female | male  | female       | male         |                                                    |    |       |              |
| 0,25                                          | 77     | 77   | 54,3   | 46,7 | 157,8  | 139,7 | 230,8  | 204,1 | 388,5  | 345,2 | <b>458,8</b> | <b>409,9</b> |                                                    |    |       |              |
| 0,5                                           | 92     | 98   | 50,6   | 44,1 | 147,2  | 133,0 | 215,6  | 194,7 | 363,5  | 330,3 | <b>429,4</b> | <b>392,4</b> |                                                    |    |       |              |
| 1                                             | 92     | 121  | 44,1   | 39,8 | 129,4  | 121,5 | 190,0  | 178,6 | 321,2  | 304,6 | <b>379,7</b> | <b>362,6</b> | 1—3                                                | 13 | 231.2 | <b>319.9</b> |
| 2                                             | 81     | 98   | 35,5   | 33,5 | 105,5  | 105,3 | 155,5  | 156,2 | 264,4  | 269,2 | <b>313,1</b> | <b>321,5</b> |                                                    |    |       |              |
| 3                                             | 75     | 82   | 30,8   | 29,2 | 93,0   | 94,6  | 137,7  | 141,5 | 235,4  | 246,7 | <b>279,3</b> | <b>295,6</b> |                                                    |    |       |              |
| 4                                             | 79     | 77   | 28,6   | 26,0 | 87,5   | 87,0  | 130,2  | 131,3 | 223,8  | 231,4 | <b>265,9</b> | <b>278,3</b> | 4—6                                                | 21 | 112.6 | <b>189.7</b> |
| 5                                             | 98     | 104  | 27,4   | 24,0 | 85,2   | 82,9  | 127,3  | 126,3 | 220,1  | 225,3 | <b>262,0</b> | <b>271,8</b> |                                                    |    |       |              |
| 6                                             | 113    | 115  | 26,5   | 22,9 | 83,5   | 81,6  | 125,4  | 125,4 | 218,1  | 226,2 | <b>260,1</b> | <b>273,9</b> |                                                    |    |       |              |
| 7                                             | 128    | 130  | 25,4   | 21,2 | 81,3   | 78,3  | 122,6  | 121,5 | 214,5  | 221,9 | <b>256,2</b> | <b>269,6</b> | 7—9                                                | 32 | 94.4  | <b>144.7</b> |
| 8                                             | 136    | 162  | 23,9   | 18,7 | 77,8   | 71,6  | 117,8  | 112,2 | 207,4  | 207,3 | <b>248,1</b> | <b>252,8</b> |                                                    |    |       |              |
| 9                                             | 146    | 178  | 22,2   | 16,1 | 73,1   | 63,8  | 111,3  | 101,0 | 197,0  | 189,0 | <b>236,2</b> | <b>231,3</b> |                                                    |    |       |              |
| 10                                            | 155    | 174  | 19,9   | 14,1 | 66,8   | 57,9  | 102,1  | 92,7  | 181,9  | 175,6 | <b>218,4</b> | <b>215,7</b> | 10                                                 | 11 | 72.5  | <b>112.4</b> |
| 11                                            | 154    | 161  | 17,6   | 12,8 | 59,8   | 54,8  | 91,9   | 88,5  | 164,7  | 169,8 | <b>198,1</b> | <b>209,4</b> | 11                                                 | 69 | 93.4  | <b>317.1</b> |
| 12                                            | 158    | 174  | 15,4   | 11,5 | 53,3   | 50,9  | 82,3   | 83,1  | 148,4  | 161,6 | <b>178,9</b> | <b>200,1</b> | 12                                                 | 21 | 95.0  | <b>186.4</b> |
| 13                                            | 163    | 160  | 13,6   | 9,5  | 48,0   | 43,8  | 74,6   | 72,3  | 135,2  | 142,4 | <b>163,3</b> | <b>177,0</b> | 13                                                 | 23 | 113.6 | <b>369.9</b> |
| 14                                            | 162    | 168  | 12,3   | 7,2  | 44,1   | 34,8  | 68,9   | 58,1  | 125,7  | 115,9 | <b>152,0</b> | <b>144,6</b> | 14                                                 | 18 | 68.2  | <b>362.8</b> |
| 15                                            | 130    | 117  | 11,3   | 5,3  | 41,2   | 26,7  | 64,6   | 45,1  | 118,6  | 91,3  | <b>143,7</b> | <b>114,4</b> | 15                                                 | 24 | 73.6  | <b>216.7</b> |
| 16                                            | 127    | 100  | 10,5   | 4,0  | 39,0   | 20,8  | 61,4   | 35,6  | 113,5  | 73,0  | <b>137,8</b> | <b>91,8</b>  | 16                                                 | 24 | 84.9  | <b>206.0</b> |
| 17                                            | 78     | 50   | 10,1   | 3,1  | 37,9   | 16,8  | 60,1   | 29,0  | 111,7  | 60,3  | <b>135,9</b> | <b>76,2</b>  | 17                                                 | 24 | 71    | <b>134.9</b> |

Table 3: Estimated 5<sup>th</sup>, 50<sup>th</sup>, 75<sup>th</sup>, 95<sup>th</sup> and 97.5<sup>th</sup> sex-adjusted percentiles for hs-Troponin T (values in ng/L) from the LIFE child study cohort (children aged 0.25-18 years)

LIFE data hs-Troponin T (ng/L) select percentiles

| age, years | n      |      | 5th    |      | 50th   |       | 75th   |       | 95th   |       | 97.5th |       |
|------------|--------|------|--------|------|--------|-------|--------|-------|--------|-------|--------|-------|
|            | female | male | female | male | female | male  | female | male  | female | male  | female | male  |
| 0.25       | 20     | 17   | 8,35   | 6,11 | 17,71  | 16,22 | 22,25  | 20,47 | 32,38  | 28,26 | 37,72  | 31,66 |
| 0.5        | 79     | 89   | 5,14   | 3,92 | 10,81  | 10,12 | 13,51  | 12,71 | 19,67  | 17,49 | 23,04  | 19,61 |
| 1          | 88     | 107  | 2,56   | 2,05 | 5,32   | 5,04  | 6,58   | 6,26  | 9,63   | 8,58  | 11,43  | 9,64  |
| 2          | 77     | 83   | 1,73   | 1,50 | 3,59   | 3,45  | 4,37   | 4,21  | 6,52   | 5,75  | 8,02   | 6,50  |
| 3          | 74     | 76   | 1,39   | 1,44 | 2,90   | 3,15  | 3,49   | 3,80  | 5,33   | 5,19  | 6,83   | 5,93  |
| 4          | 74     | 73   | 1,39   | 1,37 | 2,91   | 2,93  | 3,47   | 3,50  | 5,41   | 4,81  | 7,18   | 5,56  |
| 5          | 93     | 102  | 1,36   | 1,42 | 2,81   | 2,99  | 3,31   | 3,55  | 5,20   | 4,94  | 7,05   | 5,80  |
| 6          | 111    | 111  | 1,28   | 1,48 | 2,58   | 3,12  | 3,02   | 3,69  | 4,70   | 5,21  | 6,36   | 6,24  |
| 7          | 118    | 127  | 1,36   | 1,40 | 2,64   | 2,96  | 3,08   | 3,49  | 4,67   | 5,04  | 6,20   | 6,16  |
| 8          | 130    | 155  | 1,51   | 1,28 | 2,81   | 2,75  | 3,25   | 3,24  | 4,79   | 4,78  | 6,18   | 5,98  |
| 9          | 142    | 173  | 1,53   | 1,28 | 2,74   | 2,81  | 3,16   | 3,33  | 4,52   | 5,02  | 5,65   | 6,41  |
| 10         | 149    | 174  | 1,62   | 1,22 | 2,80   | 2,74  | 3,22   | 3,26  | 4,49   | 5,04  | 5,47   | 6,54  |
| 11         | 152    | 155  | 1,66   | 1,30 | 2,81   | 3,01  | 3,23   | 3,60  | 4,42   | 5,66  | 5,27   | 7,45  |
| 12         | 157    | 172  | 1,66   | 1,25 | 2,77   | 3,00  | 3,19   | 3,61  | 4,31   | 5,78  | 5,07   | 7,67  |
| 13         | 158    | 154  | 1,62   | 1,25 | 2,71   | 3,12  | 3,13   | 3,80  | 4,21   | 6,16  | 4,91   | 8,18  |
| 14         | 156    | 168  | 1,71   | 1,23 | 2,88   | 3,25  | 3,34   | 4,01  | 4,51   | 6,55  | 5,26   | 8,66  |
| 15         | 123    | 105  | 1,72   | 1,30 | 2,97   | 3,67  | 3,47   | 4,59  | 4,75   | 7,54  | 5,57   | 9,88  |
| 16         | 122    | 94   | 1,61   | 1,38 | 2,93   | 4,22  | 3,45   | 5,38  | 4,83   | 8,87  | 5,77   | 11,48 |
| 17         | 74     | 48   | 1,45   | 1,37 | 2,84   | 4,64  | 3,39   | 6,04  | 4,97   | 10,00 | 6,14   | 12,77 |
| 18         | 36     | 21   | 1,18   | 1,56 | 2,63   | 5,98  | 3,18   | 8,00  | 5,07   | 13,31 | 6,71   | 16,76 |
